# Supplementary material for: A genome-wide association study reveals a novel regulator of ovule number and fertility in Arabidopsis thaliana
Source: PubMed Central journal article supplement (PMC6386413; doi:10.1371/journal.pgen.1007934), 2019-02-11

**A**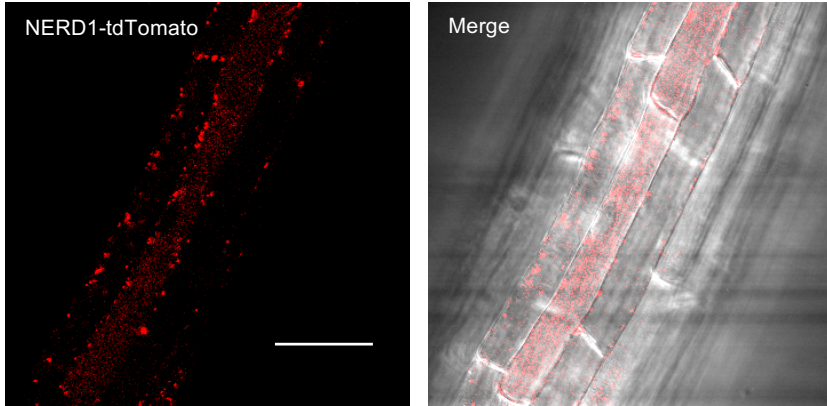**B**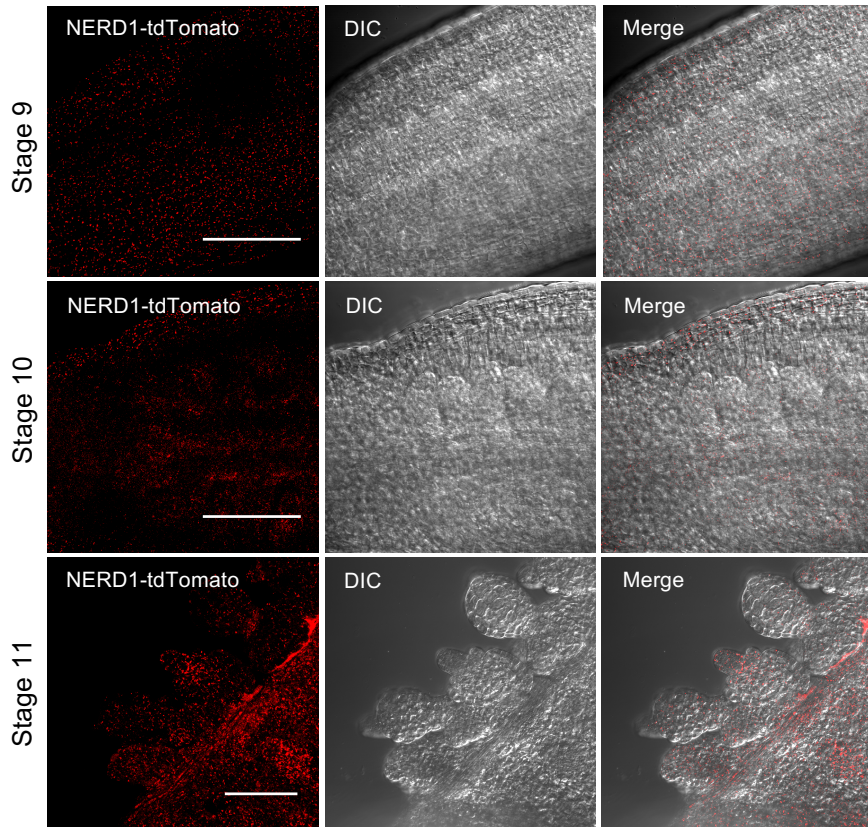**C**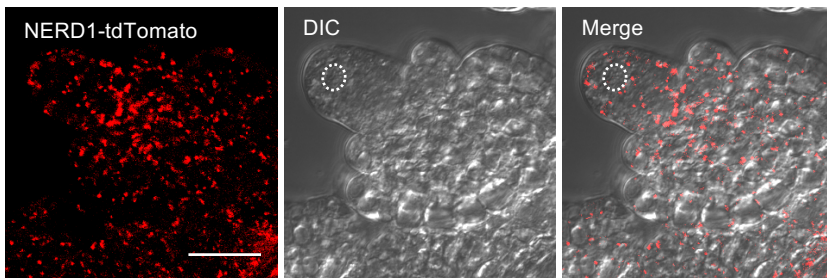

Supplement: pgen.1007934.s009.pdf [file pgen.1007934.s009.pdf]
