# Supplementary material for: A genome-wide association study reveals a novel regulator of ovule number and fertility in Arabidopsis thaliana
Source: PubMed Central journal article supplement (PMC6386413; doi:10.1371/journal.pgen.1007934), 2019-02-11

A

| Accessions | Sterile plants | Normal plants |
|------------|----------------|---------------|
| Col-0      | 4              | 6             |
| Altai-5    | 1              | 9             |

B

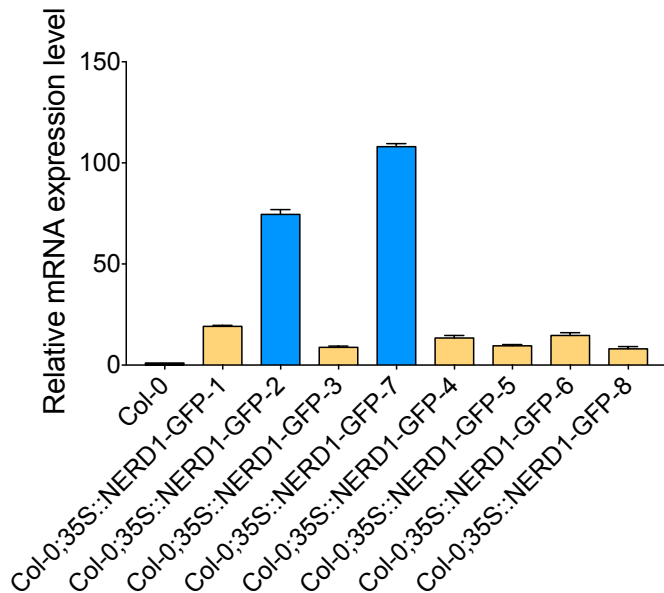

Supplement: pgen.1007934.s011.pdf [file pgen.1007934.s011.pdf]
