# Supplementary material for: A genome-wide association study reveals a novel regulator of ovule number and fertility in Arabidopsis thaliana
Source: PubMed Central journal article supplement (PMC6386413; doi:10.1371/journal.pgen.1007934), 2019-02-11

A

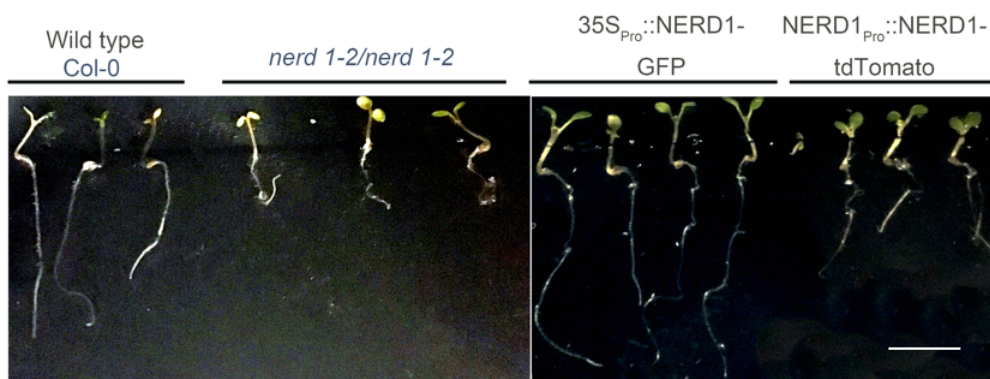

B

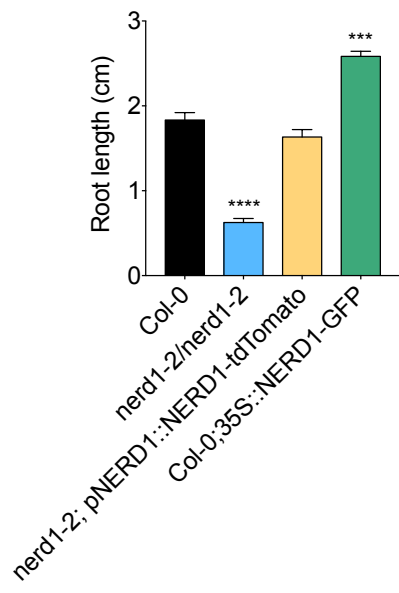

Supplement: pgen.1007934.s012.pdf [file pgen.1007934.s012.pdf]
